# Supplementary material for: The light induced valence change of europium in Sr2SiO4 ? Eu involving transient crystal structureElectronic supplementary information (ESI) available: details of the experiment under different irradiation conditions, characterization by XRD and PL spectra of Ba2SiO4 ? Eu3+ and Ca2SiO4 ? Eu3+. See http://www.rsc.org/suppdata/jm/b4/b400515e/
Source: Royal Society of Chemistry journal article supplement (doi:10.1039/b400515e), 2004-01-01
Supplement: b400515e.doc [file b400515e.doc]

**Supplementary information for the Article Ref. B400515E**

**Journal of Materials Chemistry**

The light induced valence change of europium in Sr2SiO4:Eu involving transient crystal structure

Abanti Nag and T. R. N. Kutty*

**X-ray Diffraction Analyses**

Strontium orthosilicate, has two phases, a high-temperature orthorhombic (α'-Sr2SiO4) and a low-temperature monoclinic phase (β-Sr2SiO4). The transition temperature between the two phases is at ~85oC. Fig S1 and S2 show the x-ray diffraction patterns of Sr2SiO4:Eu with different substituents. The samples prepared in this work are all in α-phase which is metastable at room temperature. The stability of α-phase at room temperature cannot be attributed to the surface free energy contribution of the fine powder nature of samples prepared in the present case. This is because of the fact that samples recrystallized at higher temperatures in presence of SrF2 as flux; with substantial grain growth also stabilized as α-phase. In Fig. S1(a), the x-ray diffraction pattern of the as-prepared Sr2SiO4:Eu is compared with JCPDS data (JCPDS Card No. 39-1256). The phase is identified as α´-Sr2SiO4 with the space group, Pnma. The phase remains unchanged after irradiation as shown in Fig. S1(b). The substitution on Sr by Ba or Ca in Sr2SiO4 (Sr2-xMxSiO4, M = Ba, Ca; 0 ≤ x ≤ 0.5) also show similar features [Fig. S1(c) and (d)], except that there is marginal expansion of cell volume in the case of Sr2-xBaxSiO4 whereas Sr2-xCaxSiO4 shows volume contraction. This can be explained on the basis of the difference in ionic radii which is in the order, rCa2+<rSr2+<rBa2+. On the other hand, the end member Ba2SiO4 stabilizes as orthorhombic form (Pnam) which is the only stable modification of Ba-orthosilicate, whereas, Ca2SiO4 stabilizes as monoclinic β-form (P21/n). This is because of the fact that the transition temperature for β  α is much higher for Ca2SiO4 (~680oC) than that of Sr2SiO4 (~85oC).

Fig. S2 shows the XRD pattern of (Sr1-xMx)2Si1-yMyO4:Eu (M = Mg, Li; M = Al, B; 0 ≤ x ≤ 0.1; 0 ≤ y ≤ 0.1). All the compositions are identified as phase pure Sr2SiO4 without the presence of any minor phase. Further, there are only changes of cell parameters. The irradiation experiment was also carried out for substituted Sr2SiO4:Eu and found that the phase remains unchanged after irradiation.

**
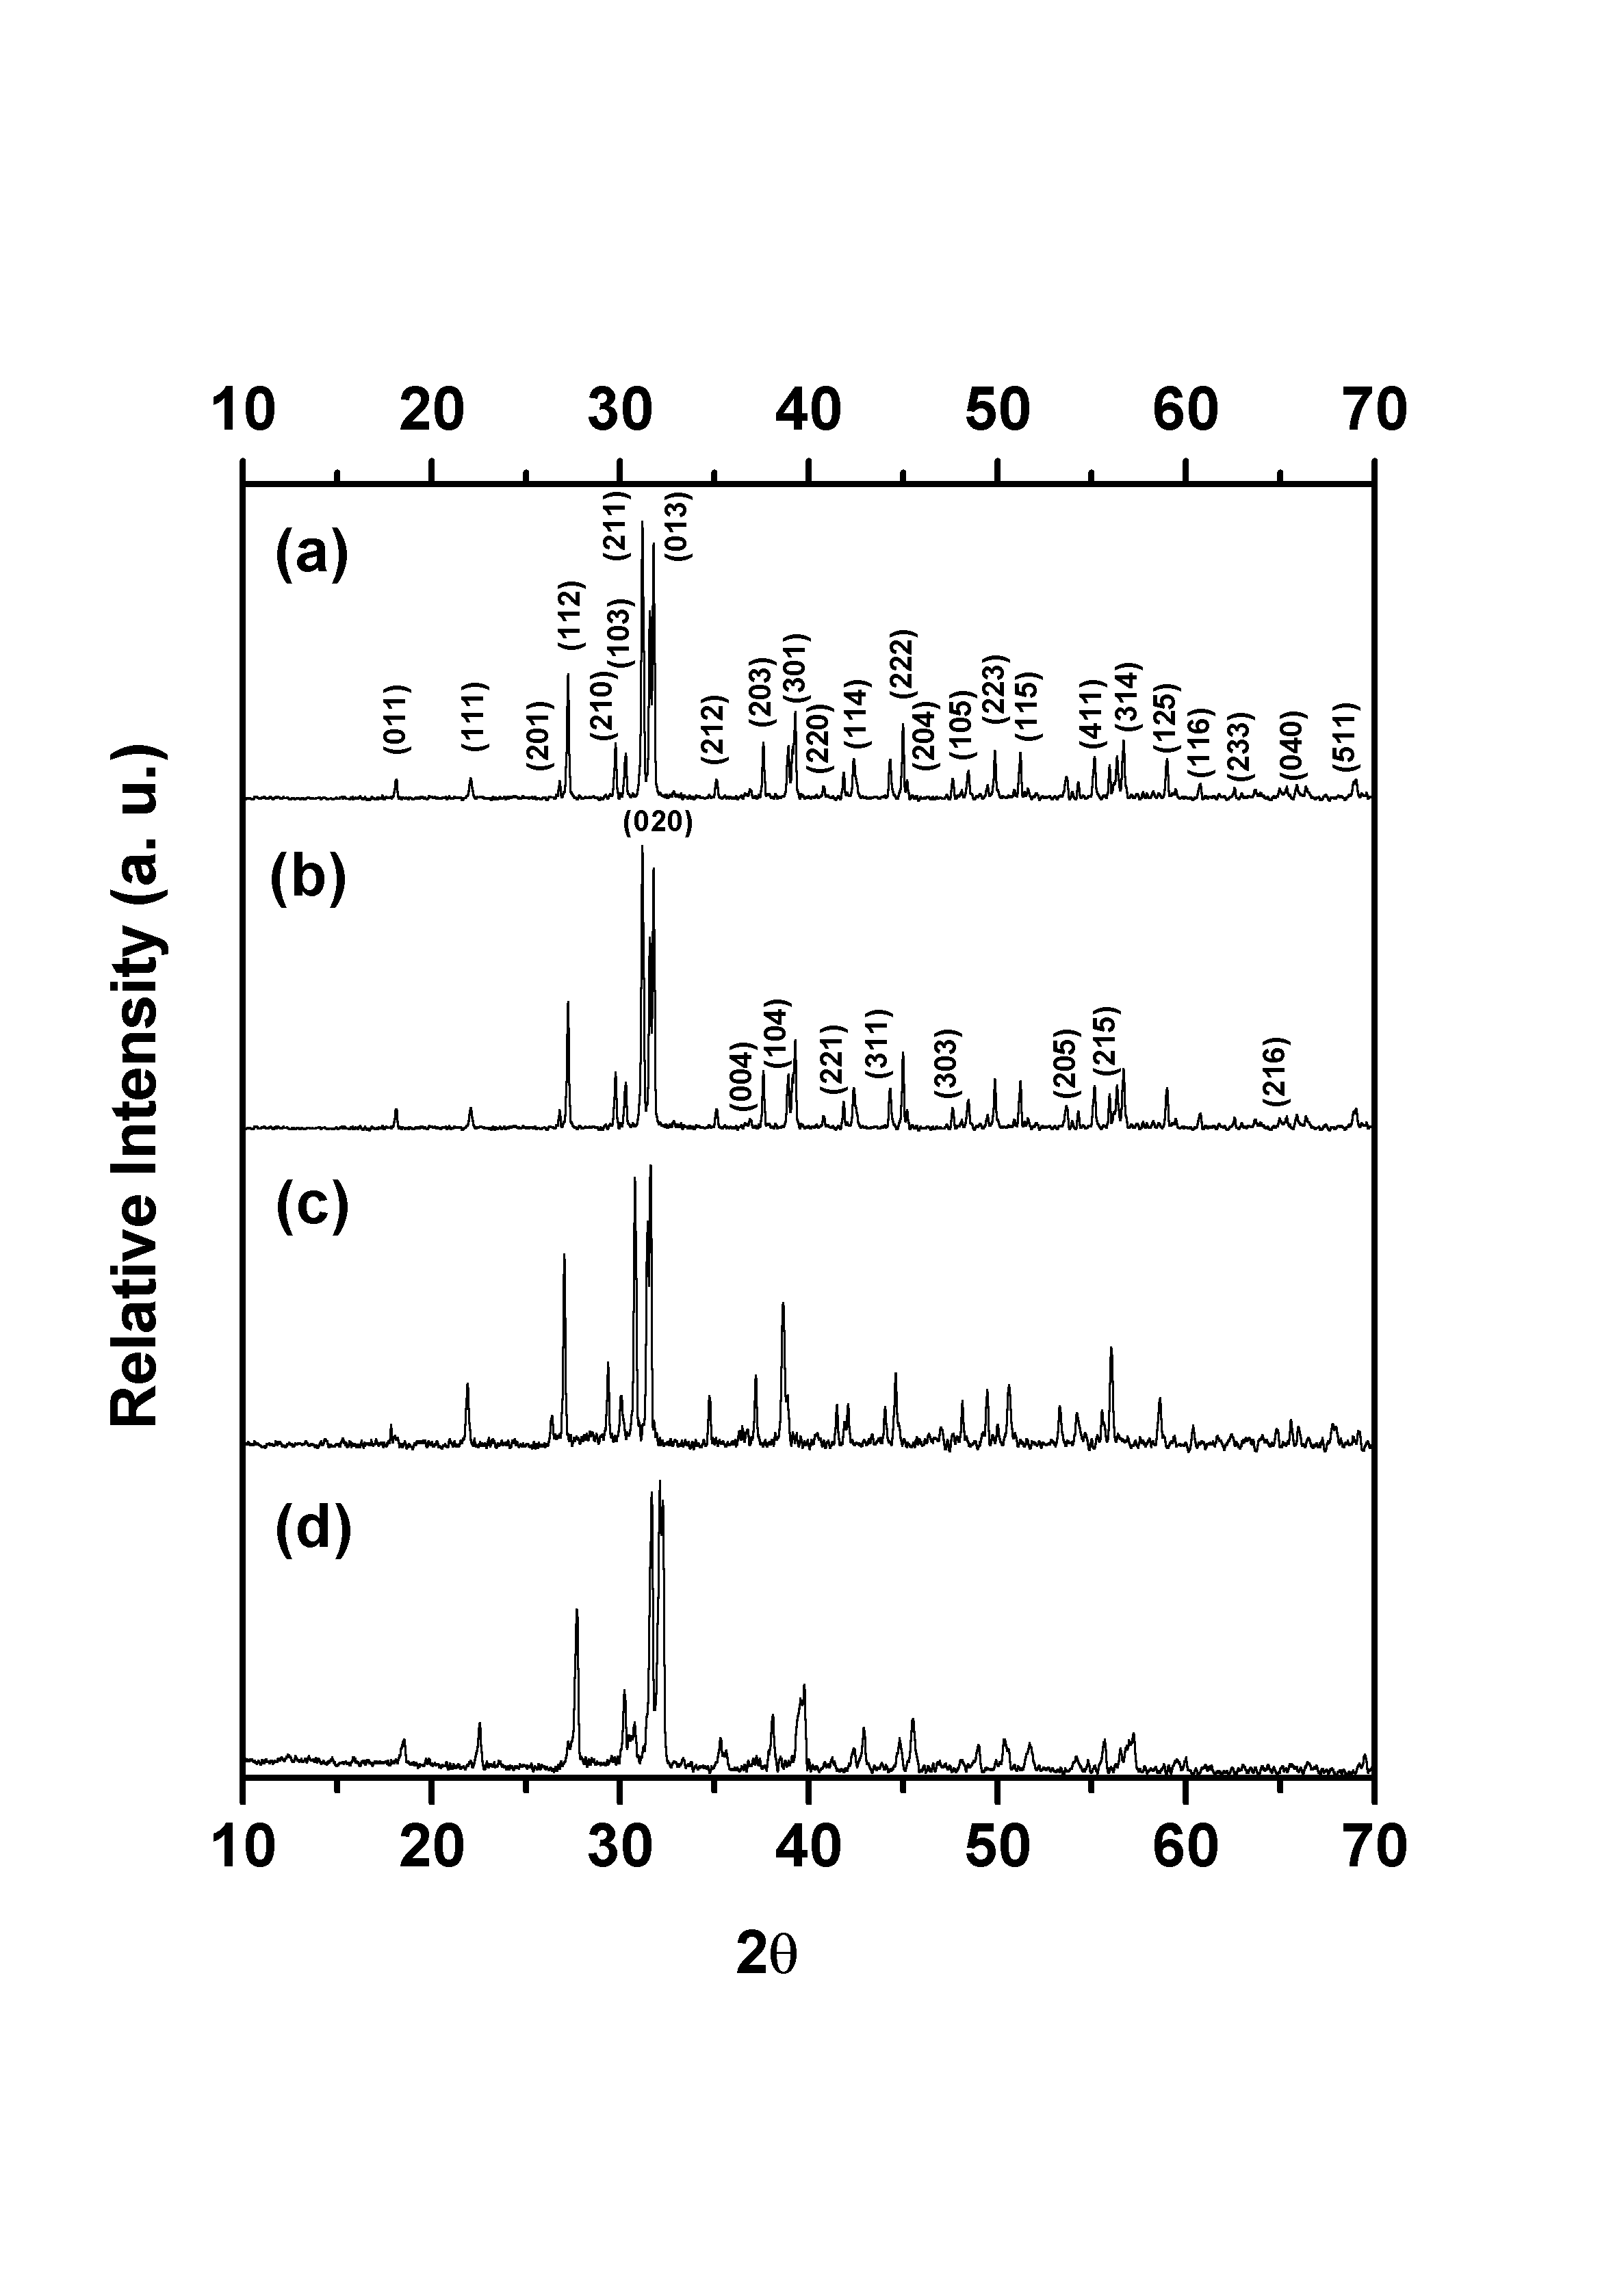
**

***Fig. S1*** *X-ray diffraction patterns of (a) Sr2SiO4:Eu before irradiation, (b) Sr2SiO4:Eu after irradiation, (c) Sr1.95Ba0.05SiO4:Eu after irradiation and (d) Sr1.95Ca0.05SiO4:Eu after irradiation.*


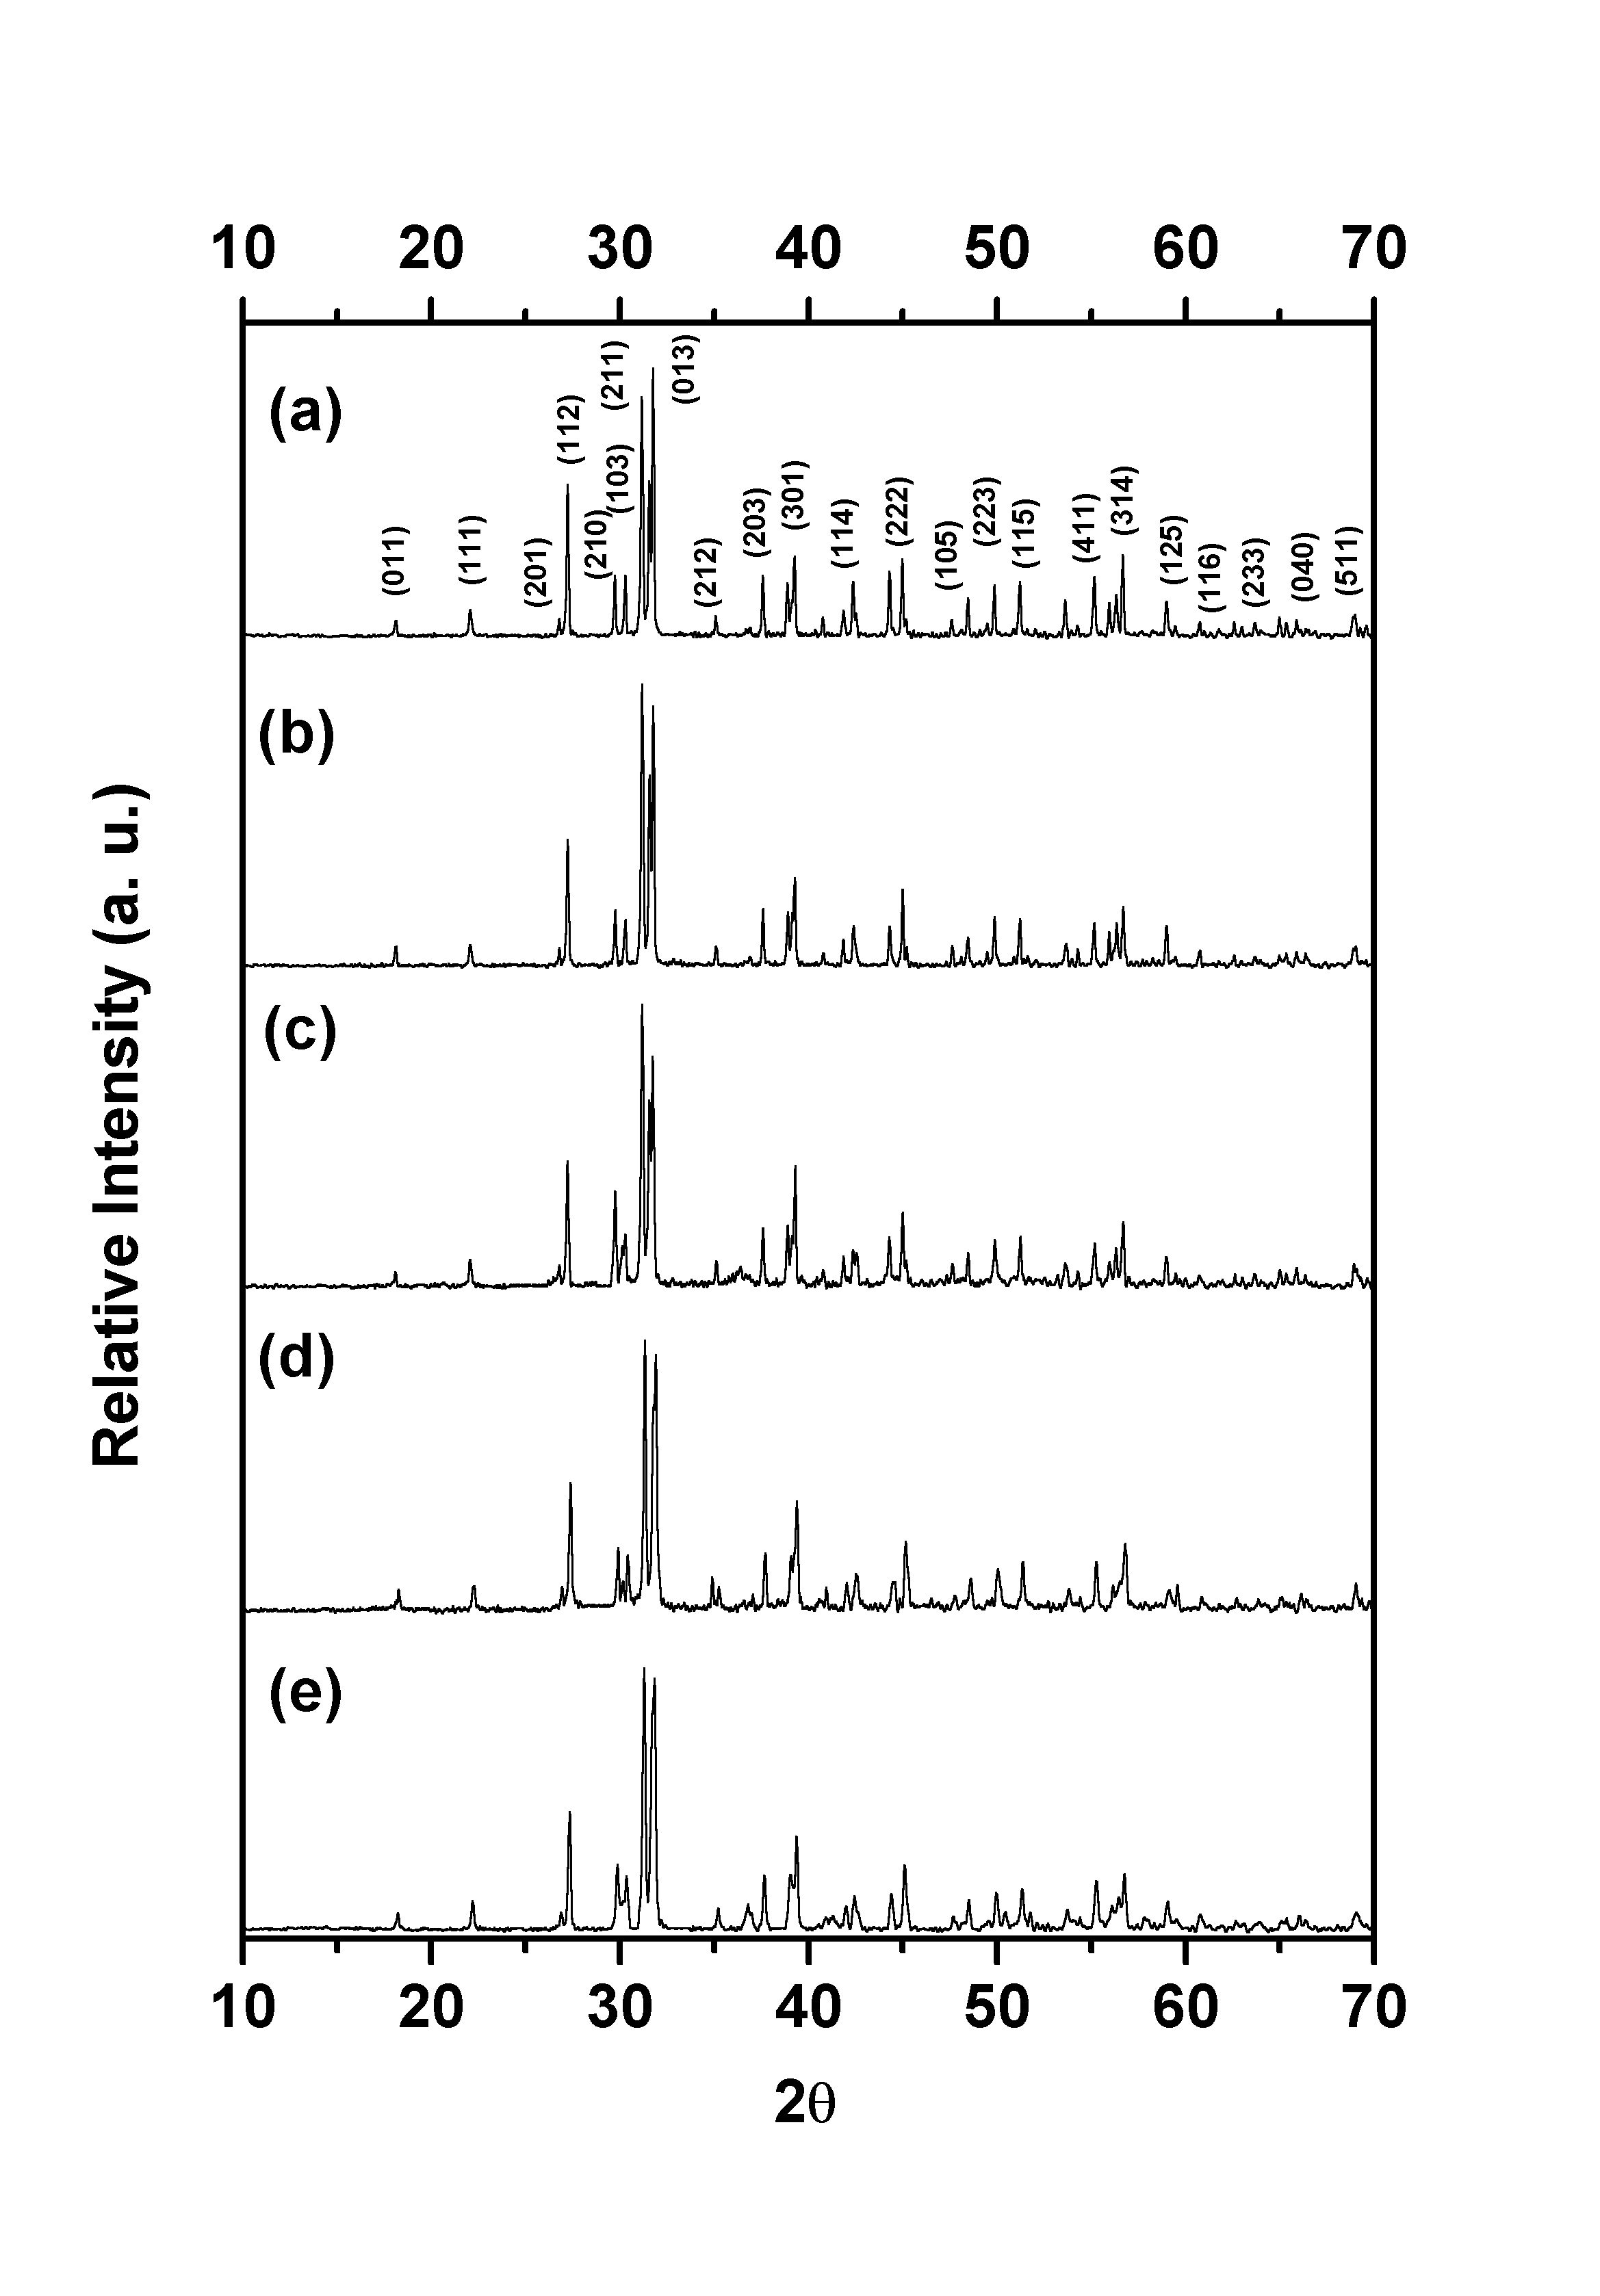


***Fig. S2*** *X-ray diffraction patterns of (a) Sr1.95Mg0.05SiO4:Eu, (b) Sr1.95Li0.05SiO3.975:Eu, (c) Sr1.98Ce0.02SiO4.02:Eu, (d) Sr2Si0.95B0.05O3.975:Eu and (e) Sr2Si0.95Al0.05O3.975:Eu.*

**Photoluminescence of Ba2SiO4:Eu3+, Ca2SiO4:Eu3+ and Sr2-xMxSiO4:Eu3+ (M = Ba, Ca)**

The end member, Ba2SiO4:Eu3+ does not show any emission of Eu3+ at room temperature. On the other hand, Ca2SiO4:Eu3+ shows orange-red emission of Eu3+ as shown in Fig S3(a). The broad band seen in the excitation spectrum around 260 nm is due to [Eu3+←O2-] CT transition and the sharp peaks in the range of 300 to 550 nm are due to the transition from the ground 7F0-level to the excited 5D*J* state (*J* =1-4) of Eu3+. The emission spectrum consists of a series of sharp lines originating from 5D0 level after non-radiative relaxation from excited 5D*J* (*J* =1-4) states. In Ca2SiO4:Eu3+, both magnetic (5D0–7F1) and forced electric dipole (5D0–7F2) transitions are observed. However, 5D0–7F2 emission is much stronger than that of 5D0–7F1. The magnetic dipole transition dominates when Eu3+ occupies at the site with inversion symmetry, whereas, the electric dipole transition appear for the Eu3+ ion occupying the site that has no inversion symmetry. This indicates that Eu3+ in Ca2SiO4 occupies low symmetry sites i.e. the site that has no inversion symmetry. Moreover, 5D0–7F0 transition (indicated by a downward arrow in Fig. S3a), which was a dominant emission in the case of Sr2SiO4:Eu3+, has negligible intensity for Ca2SiO4:Eu3+. Further, unlike Sr2SiO4:Eu3+, the Eu3+ emission in Ca2SiO4 does not quench with time. Hence, it can be concluded that there is a periodic relation of Eu3+ emission between three alkaline-earth orthosilicates.

The irradiation experiments were also carried out for end-member compositions. Ba2SiO4:Eu2+ shows broad band PL with its maximum at 500 nm at room temperature. Similarly, Ca2SiO4:Eu2+ shows peak maximum at 505 nm at room temperature. Hence, it can be expected that both Ba and Ca orthosilicate may show the photoinduced reduction of Eu3+Eu2+ under irradiation. However, both Ba2SiO4:Eu and Ca2­­SiO4:Eu did not show any photoactivity while irradiated by short UV or x-rays.

The PL and irradiation experiment were carried out with samples in which Sr2+ is partially substituted by Ba or Ca (Sr2-xMxSiO4, M= Ca, Ba; 0 ≤ x ≤ 0.5). The substitution at limited concentrations does not alter the PL properties of Sr2SiO4:Eu3+. Fig S3(b) shows the excitation and emission spectra of Sr1.95Ca0.05SiO4:Eu3+ before irradiation. Like Sr2SiO4:Eu3+, the excitation spectrum of Sr1.95Ca0.05SiO4:Eu3+ shows peak maximum at 260 nm while monitoring at the emission wavelength of 616 nm whereas excitation band at 315 nm dominates when monitored at λem = 575 nm. Further, the emission at 616 and 590 nm show comparable intensities when monitored at 260 nm whereas emission at 575 and 622 nm dominate under λexc = 315 nm. As already mentioned, the distinct difference in relative intensities of the two sets of emission lines depending upon the excitation wavelength is due to varying site symmetry for two different Sr2+ positions in which Eu3+ is substitutively present. Moreover, Sr1.95Ba0.05SiO4:Eu3+ also shows similar PL properties whereas the emission intensity decreases with Ba-content. Further, both Ba and Ca-substituted compositions show quenching effect of Eu3+ emission as it is found in the case of Sr2SiO4:Eu3+. Furthermore, Sr2-xBaxSiO4:Eu shows photoinduced reduction of Eu3+Eu2+; however, the yellow-white emission of Eu2+ is quenched when the Ba-content is more than 20 mol% (x>0.2). On the other hand, Sr2-xCaxSiO4:Eu shows bright yellow-white emission from photoreduced Eu2+ after irradiation over a broad compositional range (0≤x≤0.5) [Fig. S3(c)].


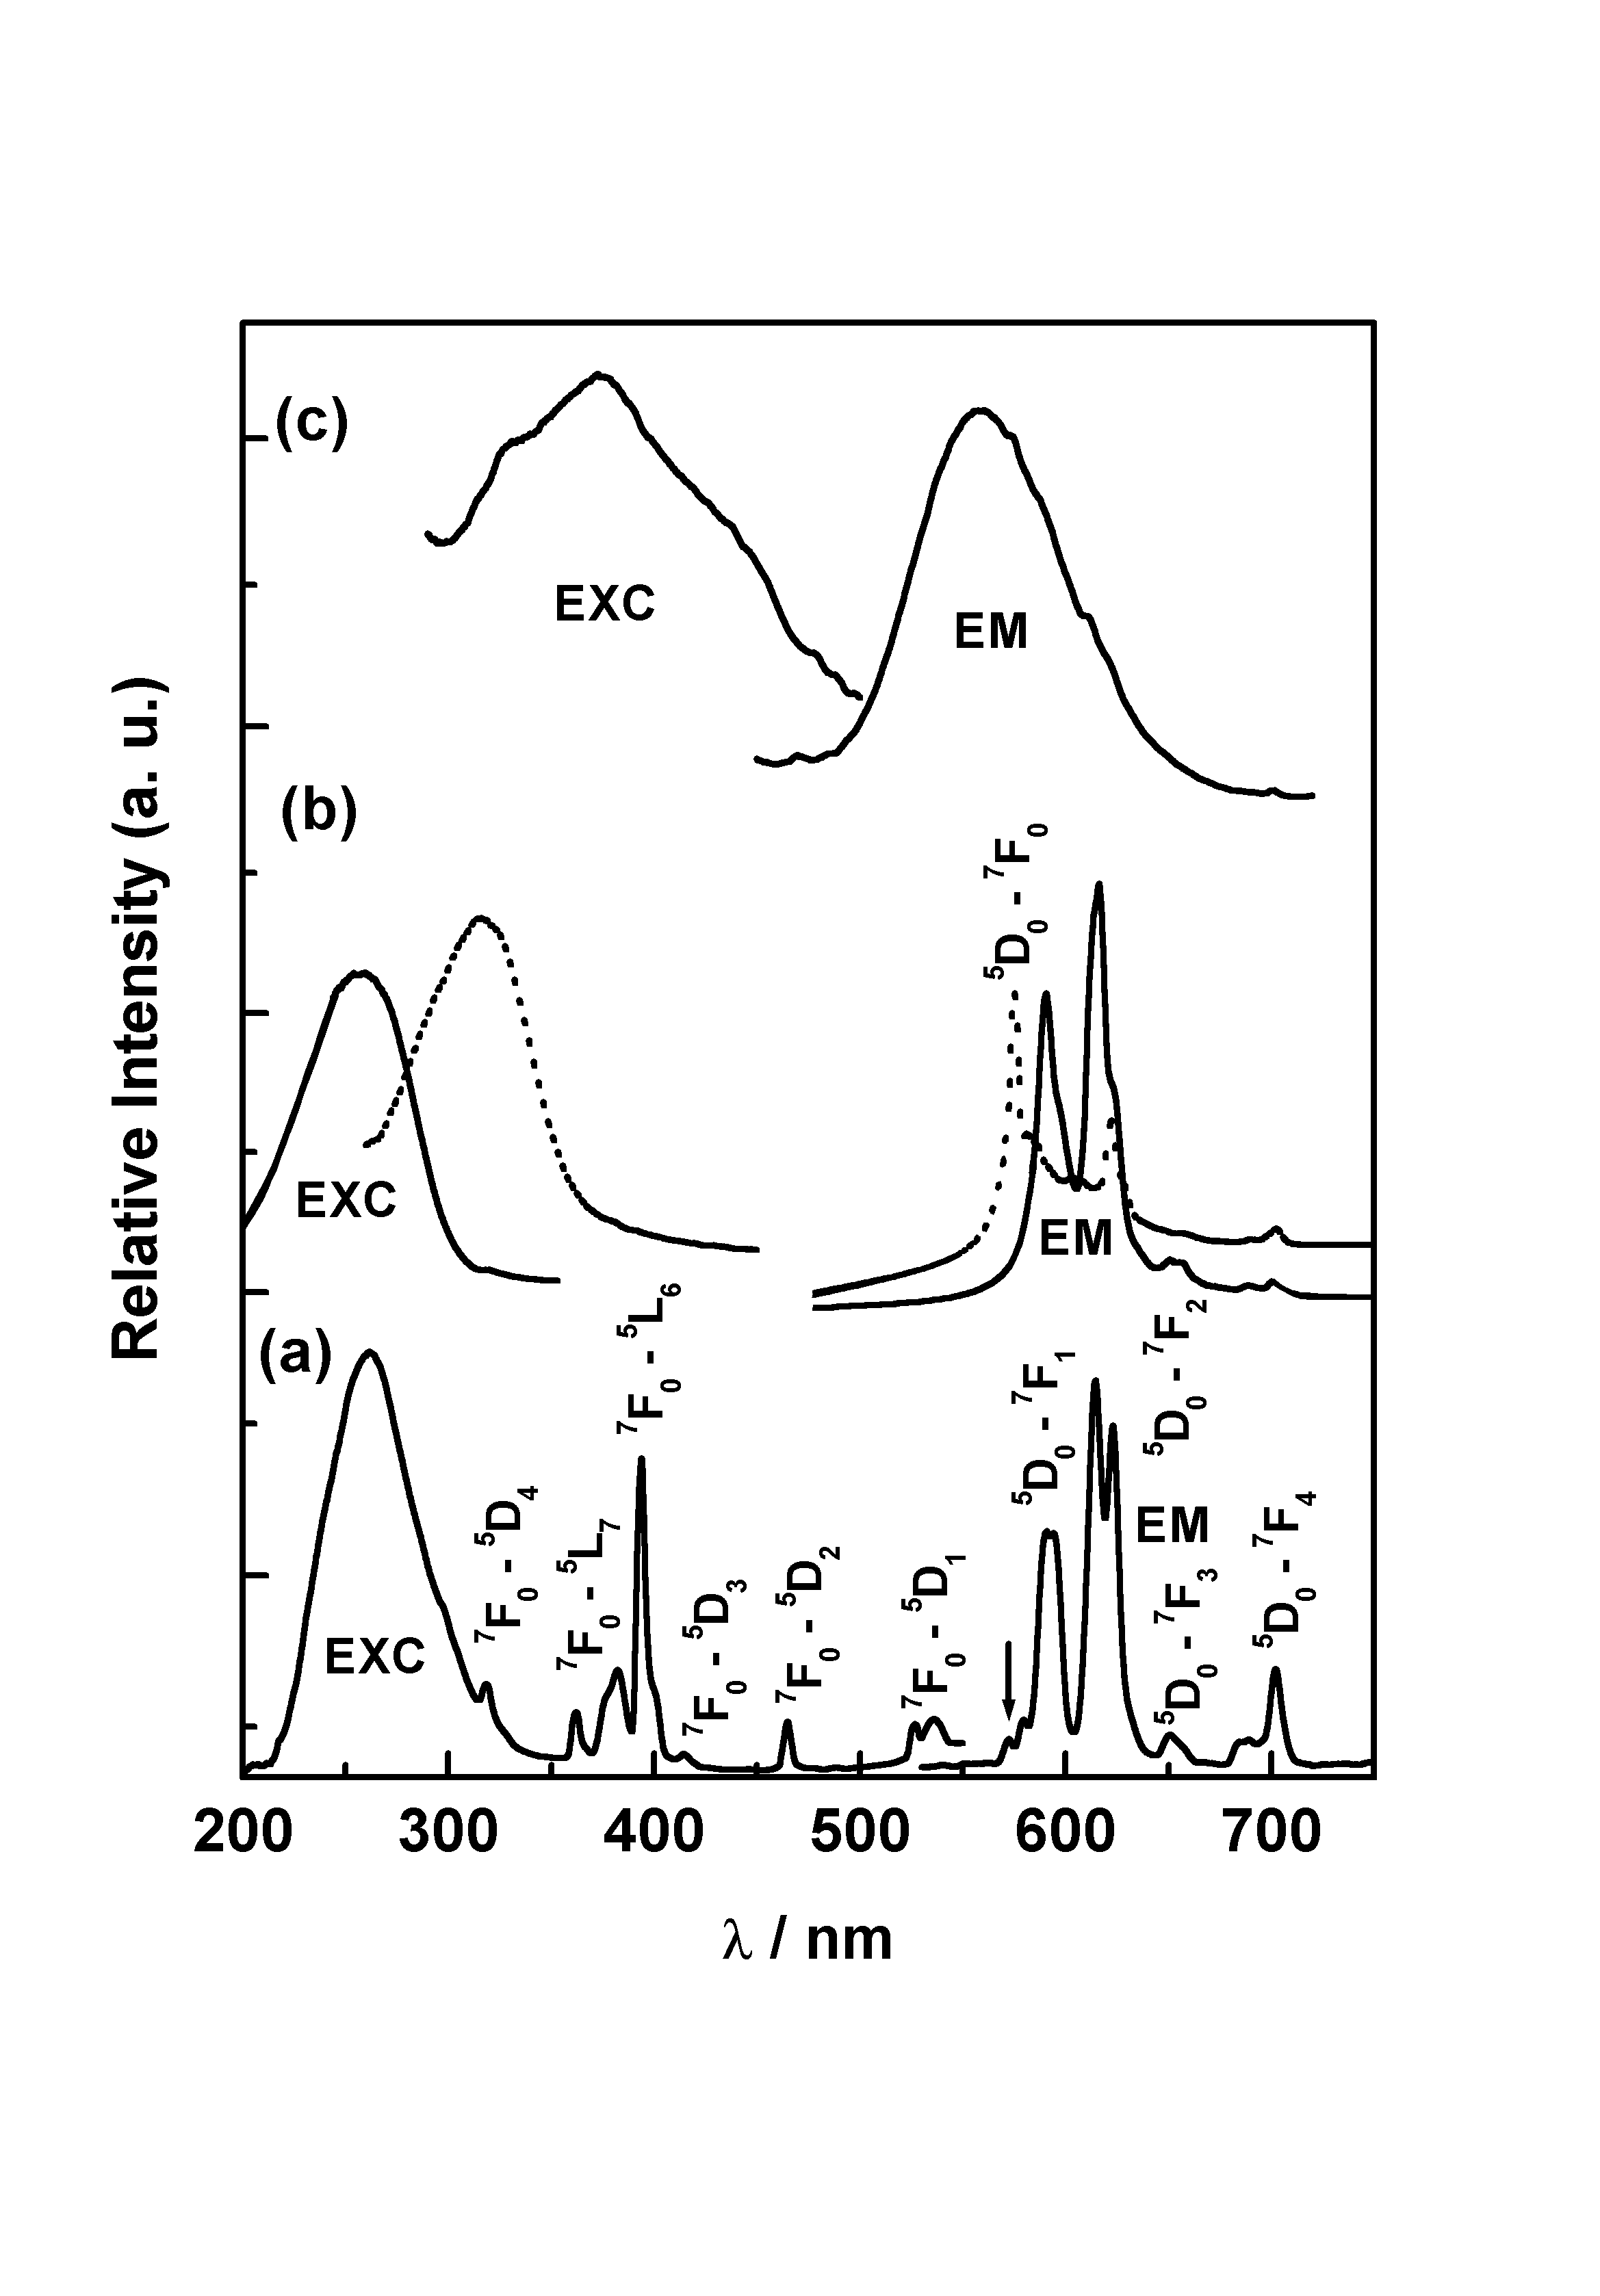


***Fig. S3*** *Excitation (EXC) and emission (EM) spectra of Sr2-xCaxSiO4:Eu at room-temperature: (a) x = 2 (Ca2SiO4:Eu3+), before irradiation (λem = 615 nm, λexc = 260 nm), (b) x = 0.05, before irradiation (solid curves: λem = 616 nm, λexc = 260 nm; dotted curves: λem = 575 nm, λexc = 315 nm) and (c) x = 0.05, after irradiation (λem = 556 nm, λexc = 378 nm).*

**Irradiation Under Different Conditions**

It is possible to envisage that photoinduced reduction of Eu3+ to Eu2+ in Sr2SiO4 may be induced by adsorbed H2O molecules which subsequently diffuse out as H2 and O2 from the surface under UV illumination accompanied by the initial decomposition of (H2O)ad to H2 and OH• radicals. In order to find whether hydroxyl (OH•) or peroxy hydroxide (OOH•) radicals play any role in the photoactivity, irradiation experiments were carried out in presence of adsorbed H2O as well as H2O2. Experiments were also repeated in presence of strong reducing agent such as ascorbic acid which chemisorbs on Sr2SiO4. However, photoactivity is found to be slower in presence of H2O, H2O2 or reducing agents than that in dry atmosphere which ruled out the involvement of hydroxyl or peroxide radicals in the optically assisted reduction process. Furthermore, the irradiation of freshly prepared Sr2SiO4:Eu3+ was carried out under completely dry environment in presence of strong desiccants such as P2O5 or MgClO4 and ascarite (NaOH mounted on asbestos) in an air-tight glove-box. It is found that photoreduction is more effective in dry atmosphere which again ruled out the involvement of adsorbed H2O or CO2 in the photoreduction process.
